# Supplementary material for: Structural and Functional Characterization of Camelus dromedarius Glutathione Transferase M1-1
Source: MDPI journal article supplement (doi:10.3390/life12010106), 2022-01-12
Supplement: s1 [file s1]

## Supplementary

**Table S1.** Comparison of the subunit–subunit interface area.

| $\mu$ -GST       | Interface Area (Å <sup>2</sup> ) |
|------------------|----------------------------------|
| <i>CdGSTM1-1</i> | 1379.5                           |
| 1xw6             | 1249.2                           |
| 1ab6             | 1383.6                           |
| 4gtu             | 1353.6                           |
| 2dc5             | 1358.8                           |
| 1gsu             | 1212.2                           |
| 5an1             | 1157.5                           |
| 6gst             | 1328.5                           |

**Table S2.** Salt bridges between the *CdGSMT1* subunits (cut-off distance 4.0 Å).

| Subunit C   | Distance (Å) | Subunit A |
|-------------|--------------|-----------|
| Arg82 NE    | 3.47         | Glu91 OE1 |
| Arg82 NH2   | 3.21         | Glu91 OE1 |
| Arg82 NE    | 3.00         | Glu91 OE2 |
| Arg82 NH2   | 3.99         | Glu91 OE2 |
| His68 NE2   | 3.18         | Glu92 OE1 |
| Arg78 NH2   | 2.98         | Asp98 OD1 |
| Arg78 NE    | 3.10         | Asp98 OD1 |
| Arg78 NH2   | 3.59         | Asp98 OD2 |
| Arg78 NE    | 2.74         | Asp98 OD2 |
| Arg82 NH1   | 2.86         | Asp98 OD2 |
| Arg82 NH2   | 3.81         | Asp98 OD2 |
| Glu91 OE1   | 3.97         | Arg82 NH2 |
| Glu91 OE1   | 3.17         | Arg82 NE  |
| Glu91 OE2   | 2.76         | Arg82 NH2 |
| Glu91 OE2   | 3.02         | Arg82 NE  |
| Asp98 OD1   | 3.00         | Arg78 NH1 |
| Asp98 OD2   | 2.83         | Arg82 NH1 |
| Asp98 OD2   | 3.99         | Arg82 NH2 |
| Glu101 OE1  | 3.27         | Arg78 NH1 |
| Glu101 OE1  | 3.94         | Arg78 NH2 |
| Glu101 OE2  | 3.96         | Arg78 NH1 |
| Glu 101 OE2 | 3.24         | Arg78 NH2 |
| Subunit F   | Distance (Å) | Subunit B |
| Arg78 NE    | 3.20         | Asp98 OD1 |
| Arg78 NE    | 2.95         | Asp98 OD2 |
| Arg78 NH2   | 3.27         | Asp98 OD1 |
| Arg78 NH2   | 3.89         | Asp98 OD2 |
| Arg82 NE    | 2.85         | Glu91 OE1 |
| Arg82 NE    | 3.09         | Glu91 OE2 |
| Arg82 NH1   | 3.06         | Asp98 OD2 |
| Arg82 NH2   | 3.70         | Glu91 OE1 |

---

|            |      |            |
|------------|------|------------|
| Arg82 NH2  | 2.60 | Glu91 OE2  |
| Glu91 OE1  | 2.98 | Arg82 NE   |
| Glu91 OE2  | 3.16 | Arg82 NE   |
| Glu91 OE2  | 2.90 | Arg82 NH2  |
| Glu92 OE2  | 3.68 | His68 NE2  |
| Asp98 OD1  | 2.77 | Arg78 NH1  |
| Asp98 OD2  | 2.83 | Arg82 NH1  |
| Asp98 OD2  | 3.80 | Arg82 NH2] |
| Glu101 OE1 | 3.27 | Arg78 NH1  |
| Glu101 OE1 | 3.85 | Arg78 NH2  |
| Glu101 OE2 | 3.89 | Arg78 NH1  |
| Glu101 OE2 | 3.08 | Arg78 NH2  |

---
